# Supplementary material
Source: PubMed Central journal article supplement (PMC1781474)

Figure S1

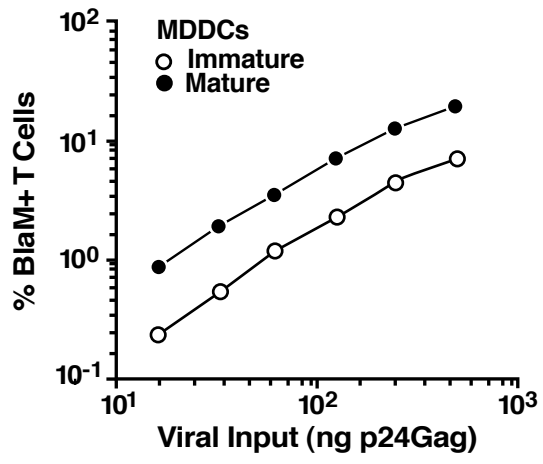

Supplement: ppat.0030004.sg001.pdf [file ppat.0030004.sg001.pdf]

**Figure S2**

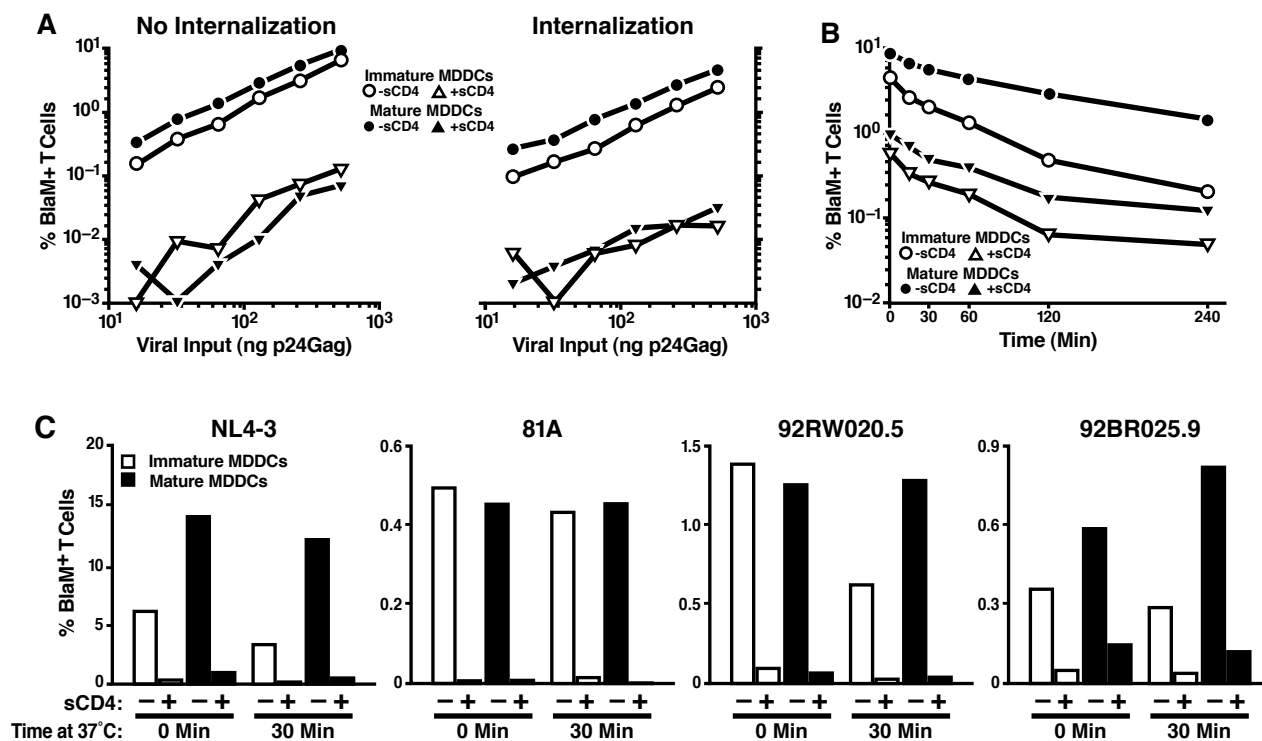

Supplement: ppat.0030004.sg002.pdf [file ppat.0030004.sg002.pdf]

**Figure S3**

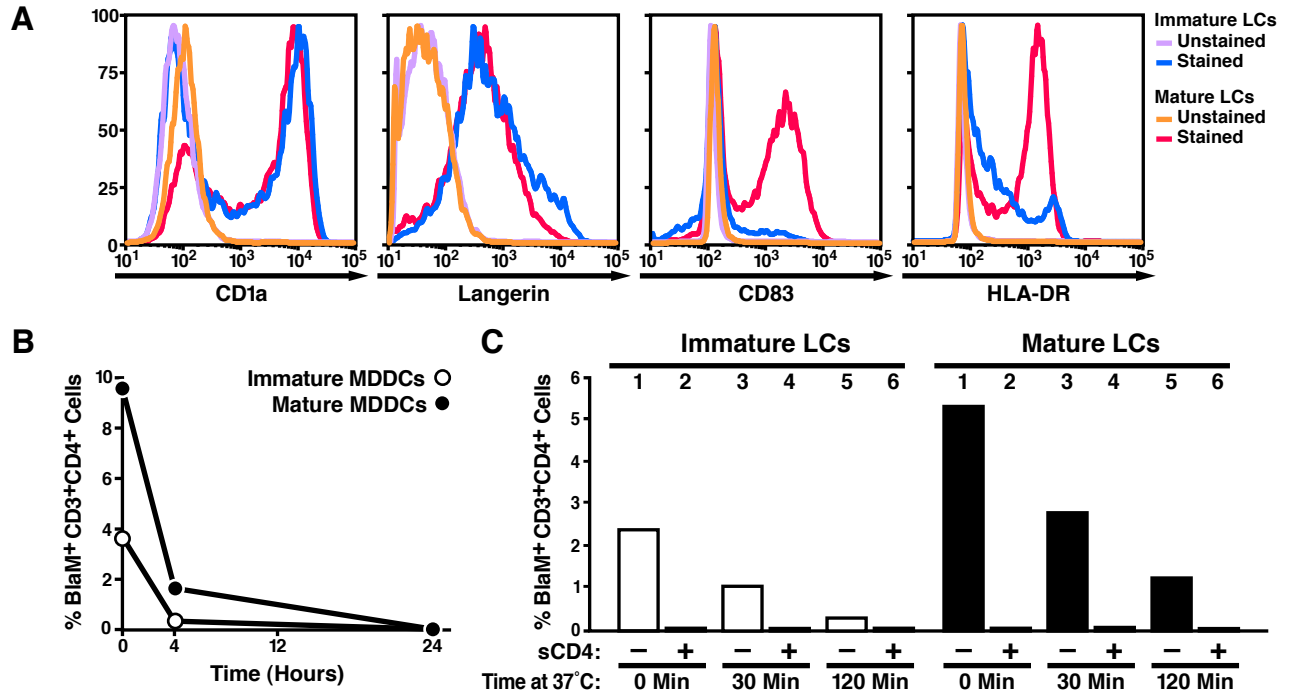

Supplement: ppat.0030004.sg003.pdf [file ppat.0030004.sg003.pdf]
